# Supplementary material
Source: publisher site journal article supplement (https://www.spandidos-publications.com/8451/downloadSupplementary)
Supplement: Supplementary file 1 [file downloadSupplementary]

Table S1. Hypermethylated candidate genes in head & neck cancers.

| Probe      | Log2 (Fold) | Gene    | Methylated cancer                                                                         | References |
|------------|-------------|---------|-------------------------------------------------------------------------------------------|------------|
| cg07655636 | 4.018       | ZNF43   | Oral squamous cell carcinoma, colorectal cancer                                           | (17,18)    |
| cg22538054 | 3.847       | USP44   | Oral squamous cell carcinoma                                                              | (19)       |
| cg11595545 | 3.827       | KCNA3   | Breast cancer                                                                             | (20)       |
| cg12042659 | 3.821       | ZNF132  | Head and neck squamous cell carcinoma                                                     | (21)       |
| cg06952671 | 3.266       | ITGA4   | Oral squamous cell carcinoma, colorectal cancer                                           | (22,23)    |
| cg26014391 | 2.467       | PHYHIPL | Cholangiocarcinoma                                                                        | (24)       |
| cg25886284 | 2.403       | ZFP82   | Head and neck squamous cell carcinoma, gingivobuccal complex oral squamous cell carcinoma | (21,25)    |
| cg14893163 | 1.719       | PCDH17  | Esophageal squamous cell carcinoma                                                        | (26)       |
| cg16902509 | 1.122       | ITGA8   | Breast cancer                                                                             | (27)       |

Table SII. Top 50 up- and downregulated proteins in FaDu cells.

| Top 50 up-regulated proteins in FaDu |          | Top 50 down-regulated proteins in FaDu |           |
|--------------------------------------|----------|----------------------------------------|-----------|
| Gene symbol                          | TGA4/Con | Gene symbol                            | ITGA4/Con |
| COPS9                                | 18.614   | HYDIN                                  | 0.019     |
| MMGT1                                | 16.377   | PCMT1                                  | 0.043     |
| AHCYL2                               | 14.577   | GIGYF2                                 | 0.043     |
| TRNT1                                | 13.530   | PFDN1                                  | 0.064     |
| SF3A2                                | 11.903   | LGMN                                   | 0.089     |
| MCMBP                                | 11.253   | STX16-NPEPL1                           | 0.103     |
| MRPS12                               | 11.120   | TTC1                                   | 0.105     |
| LACTB2                               | 10.752   | NOLC1                                  | 0.109     |
| PLXNB2                               | 10.746   | LNPK                                   | 0.114     |
| RAB32                                | 10.541   | SF1                                    | 0.124     |
| SLC16A1                              | 8.932    | OSBPL9                                 | 0.129     |
| EMC6                                 | 8.663    | CD70                                   | 0.131     |
| TSG101                               | 8.092    | C11orf98                               | 0.138     |
| TES                                  | 7.876    | MMP20                                  | 0.140     |
| APOOL                                | 7.617    | TRMT5                                  | 0.159     |
| MAP7D1                               | 7.363    | SNX5                                   | 0.162     |
| NXN                                  | 7.124    | PIH1D1                                 | 0.167     |
| SDF2                                 | 6.559    | RAP2B                                  | 0.168     |
| CCNDBP1                              | 6.250    | RAB13                                  | 0.191     |
| GOLGA5                               | 5.502    | MARS2                                  | 0.193     |
| HMOX1                                | 5.484    | CNN2                                   | 0.196     |
| HBB                                  | 5.122    | PNPLA6                                 | 0.204     |
| F5                                   | 5.111    | IRF9                                   | 0.207     |
| SQSTM1                               | 5.014    | CDK9                                   | 0.209     |
| GTPBP3                               | 5.002    | RAB34                                  | 0.217     |
| ECSIT                                | 4.911    | SH3BGRL3                               | 0.224     |
| HBA1                                 | 4.778    | NUP54                                  | 0.226     |
| PDHX                                 | 4.637    | ANXA10                                 | 0.228     |
| NDUFAF4                              | 4.473    | RAD21                                  | 0.229     |
| NDUFA2                               | 4.418    | OCIAD1                                 | 0.231     |
| DERL2                                | 4.233    | MRPS26                                 | 0.246     |
| KRT9                                 | 3.953    | BCAS2                                  | 0.246     |
| SLC29A1                              | 3.833    | PSMG3                                  | 0.248     |
| YTHDF2                               | 3.823    | BAX                                    | 0.251     |
| FAM210A                              | 3.778    | CCDC127                                | 0.251     |
| AGFG1                                | 3.717    | PKN1                                   | 0.254     |
| IBA57                                | 3.512    | FAH                                    | 0.255     |
| HLA-B                                | 3.461    | ATRIP                                  | 0.255     |
| SCRN1                                | 3.459    | TSNAX                                  | 0.263     |
| PPP1R7                               | 3.453    | PDCD4                                  | 0.269     |
| CD151                                | 3.320    | DOK3                                   | 0.269     |
| NEK9                                 | 3.311    | PPIC                                   | 0.271     |
| CPTP                                 | 3.300    | NDUFAF2                                | 0.273     |
| ITIH2                                | 3.227    | GALK1                                  | 0.284     |
| MRPL22                               | 3.202    | ENO2                                   | 0.288     |
| PIGT                                 | 3.178    | LRRFIP1                                | 0.289     |
| PPP4C                                | 3.148    | UQCRCQ                                 | 0.292     |
| CD9                                  | 3.145    | BCL2L13                                | 0.293     |
| LARS2                                | 3.016    | IGF2R                                  | 0.293     |
| PITPNA                               | 2.971    | ATP6V0D1                               | 0.303     |

Table SIII. Top 50 up- and downregulated proteins in YD-15 cells.

| Top 50 up-regulated proteins in YD-15 |            | Top 50 down-regulated proteins in YD-15 |            |
|---------------------------------------|------------|-----------------------------------------|------------|
| Gene symbol                           | ITGA4 /Con | Gene symbol                             | ITGA4 /Con |
| RPL10L                                | 47.285     | 4 SV                                    | 0.024      |
| GLO1                                  | 42.145     | NIPBL                                   | 0.025      |
| SYAP1                                 | 36.749     | MARS2                                   | 0.029      |
| AGK                                   | 29.523     | INCENP                                  | 0.030      |
| PTMA                                  | 29.105     | GOLGA2                                  | 0.033      |
| RAD23A                                | 28.664     | RPLP0P6                                 | 0.036      |
| TOR1AIP2                              | 27.674     | EMC6                                    | 0.061      |
| CSTF1                                 | 27.261     | TMEM30A                                 | 0.066      |
| H3C1                                  | 26.696     | TRMT5                                   | 0.077      |
| GOLT1B                                | 25.692     | POLR2H                                  | 0.079      |
| CREB1                                 | 25.590     | USP9X                                   | 0.081      |
| CSDE1                                 | 24.877     | GPRC5A                                  | 0.087      |
| EIF3H                                 | 22.005     | GNPNAT1                                 | 0.100      |
| CD276                                 | 21.696     | PFKL                                    | 0.103      |
| HNRNPK                                | 20.643     | PPP1R13L                                | 0.105      |
| LLPH                                  | 17.889     | TREX1                                   | 0.117      |
| APP                                   | 16.461     | IBA57                                   | 0.119      |
| DCUN1D1                               | 14.777     | UNC13D                                  | 0.121      |
| UBE2I                                 | 14.197     | DBT                                     | 0.123      |
| H3C15                                 | 13.983     | PBK                                     | 0.125      |
| ORAI1                                 | 13.493     | ITGA5                                   | 0.136      |
| NPLOC4                                | 13.435     | ASS1                                    | 0.148      |
| 4 SV                                  | 13.309     | MFAP1                                   | 0.152      |
| LRRFIP1                               | 12.605     | DCAF13                                  | 0.153      |
| COPS6                                 | 12.483     | GNA11                                   | 0.161      |
| AIFM2                                 | 12.346     | DERL2                                   | 0.171      |
| LMNA                                  | 12.027     | IRF9                                    | 0.179      |
| DNPH1                                 | 11.525     | ORC2                                    | 0.183      |
| ISG15                                 | 11.130     | WDR46                                   | 0.188      |
| UBA2                                  | 10.788     | MMGT1                                   | 0.206      |
| WDR90                                 | 10.755     | GALNT2                                  | 0.207      |
| PKN1                                  | 10.590     | LEMD3                                   | 0.207      |
| PTBP3                                 | 10.469     | CLIP1                                   | 0.212      |
| BAG3                                  | 10.223     | SPATA5                                  | 0.223      |
| CDC16                                 | 10.181     | IFI44                                   | 0.226      |
| ASF1A                                 | 9.959      | CDCA3                                   | 0.238      |
| OCIAD1                                | 9.853      | DDX49                                   | 0.238      |
| PTMS                                  | 9.732      | PFDN4                                   | 0.243      |
| CHCHD4                                | 9.599      | SLCO4A1                                 | 0.248      |
| PHIP                                  | 9.534      | KRT1                                    | 0.252      |
| FAM50A                                | 9.516      | STARD3NL                                | 0.253      |
| PCMT1                                 | 9.495      | NUFIP2                                  | 0.255      |
| MOCS3                                 | 9.261      | UAP1                                    | 0.256      |
| NOL7                                  | 9.193      | BSG                                     | 0.263      |
| SDCBP                                 | 8.981      | MPDU1                                   | 0.265      |
| BAZ1B                                 | 8.276      | SNX5                                    | 0.273      |
| FOXD3                                 | 8.269      | ACAA1                                   | 0.278      |
| SF3B5                                 | 8.264      | GAN                                     | 0.279      |
| LIG1                                  | 8.210      | SLC25A4                                 | 0.284      |
| CDK7                                  | 8.092      | OSBPL8                                  | 0.284      |
